# Supplementary material for: Investigation of the influence of surface defects on peptide adsorption onto carbon nanotubes
Source: Royal Society of Chemistry journal article supplement (doi:10.1039/c003417g), 2010-06-10
Supplement: c003417g.pdf [file c003417g.pdf]

# Supporting Information : Investigation of the influence of surface defects on peptide adsorption onto carbon nanotubes

T. R. Walsh\* and Susana M. Tomasio

Dept. of Chemistry and Centre for Scientific Computing, University of Warwick,

Coventry, CV4 7AL, U.K.

## Contents

**Figure S1:** Trajectory-averaged angle and fluctuation of the aromatic ring tilt for the pristine (non-defective) peptide-CNT interface.

**Table S1:** Peptide end-to-end distances, averaged over the lowest trajectory for each sequence (B1, B3, B1Y and B3Y) for each peptide-nanotube interface.

---

\*t.walsh@warwick.ac.uk

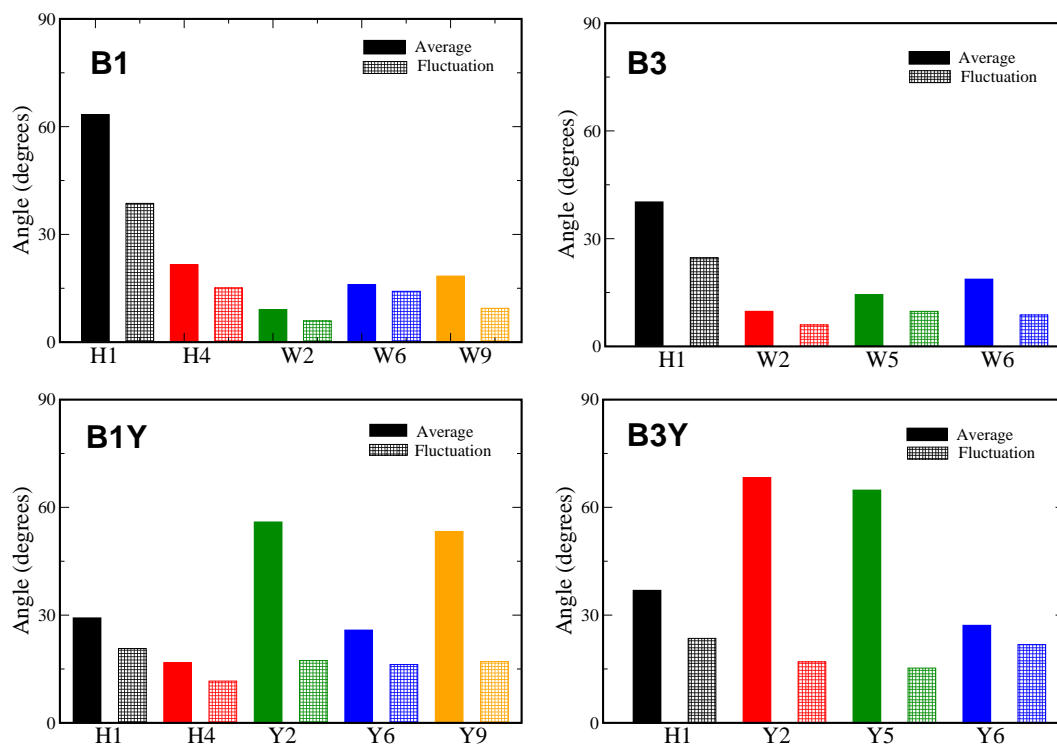

**Figure S1:** Average and fluctuation of ring tilt for the interface between each sequence and a pristine CNT. A tilt of zero indicates the ring is oriented flat on the surface.

**Table S1:** Peptide end-to-end distances,  $d$  (Å), averaged over the lowest trajectory for each sequence (B1, B3, B1Y and B3Y) for each peptide-nanotube interface.

| Pristine (no defects) |      |  |  |  |
|-----------------------|------|--|--|--|
| Sequence              | $d$  |  |  |  |
| B1                    | 27.3 |  |  |  |
| B3                    | 27.0 |  |  |  |
| B1Y                   | 13.3 |  |  |  |
| B3Y                   | 16.7 |  |  |  |

  

| 'Hydroxy' defects |              |      |              |      |
|-------------------|--------------|------|--------------|------|
| Sequence          | Distribution | $d$  | Distribution | $d$  |
| B1                | Close        | 26.7 | Distant      | 26.9 |
| B3                | Close        | 20.4 | Distant      | 21.2 |
| B1Y               | Close        | 16.9 | Distant      | 13.4 |
| B3Y               | Close        | 36.9 | Distant      | 12.8 |

  

| 'Carboxyl' defects |              |      |              |      |
|--------------------|--------------|------|--------------|------|
| Sequence           | Distribution | $d$  | Distribution | $d$  |
| B1                 | Close        | 27.0 | Distant      | 27.0 |
| B3                 | Close        | 21.2 | Distant      | 20.5 |
| B1Y                | Close        | 16.8 | Distant      | 14.2 |
| B3Y                | Close        | 17.7 | Distant      | 24.5 |
